# Supplementary material for: Connecting and disconnecting nematic disclination lines in microfluidic channels
Source: Royal Society of Chemistry journal article supplement (doi:10.1039/c5sm03092g), 2016-01-01
Supplement: c5sm03092g2.pdf [file c5sm03092g2.pdf]

Supplementary information

**Connecting and disconnecting nematic disclination lines in  
microfluidic channels**

Hakam Agha and Christian Bahr

**Movie S1:** The movie shows the electric-field-induced and flow-assisted conjunction of two disclination lines in a microfluidic channel and the reconfiguration of the two lines in response to switching off the field. The distance between the two anchoring boundaries is  $500\ \mu\text{m}$ . In the “field on” state, an AC field with a frequency of 1 kHz and amplitude of  $0.5\ \text{V}/\mu\text{m}$  is applied. The nematic liquid crystal is flowing from left to right, the flow velocity in the channel center is slowly decreasing from  $45\ \mu\text{m}/\text{s}$  at the beginning of the movie to  $35\ \mu\text{m}/\text{s}$  at the end. Therefore, the second connecting process proceeds slower than the first.
